# Supplementary material for: Contrasting Population Structures of the Genes Encoding Ten Leading Vaccine-Candidate Antigens of the Human Malaria Parasite, Plasmodium falciparum
Source: PubMed Central journal article supplement (PMC2795866; doi:10.1371/journal.pone.0008497), 2009-12-30

**A** *csp*,  $K=2$

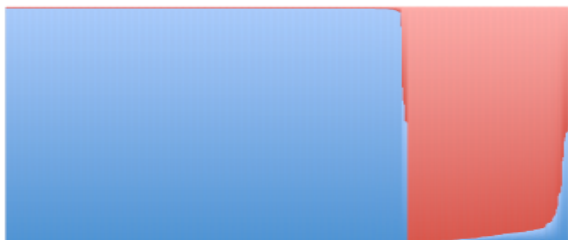

**B** *csp*,  $K=4$

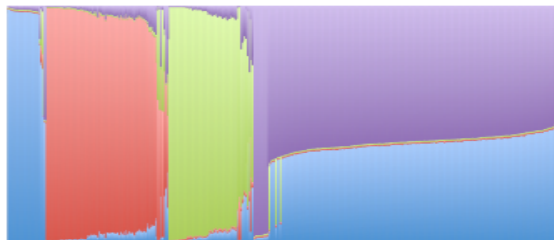

**C** *trap*,  $K=5$

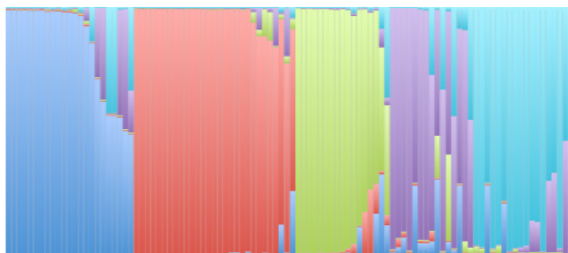

**D** *trap*,  $K=7$

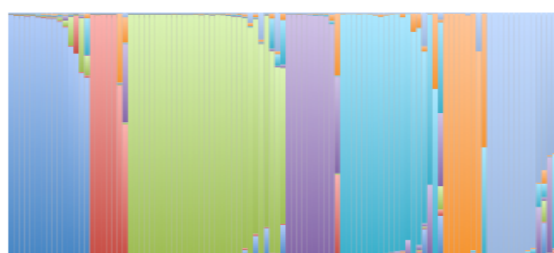

**E** *Isa1*,  $K=4$

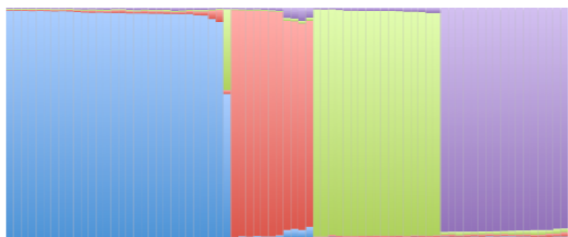

**F** *Isa1*,  $K=6$

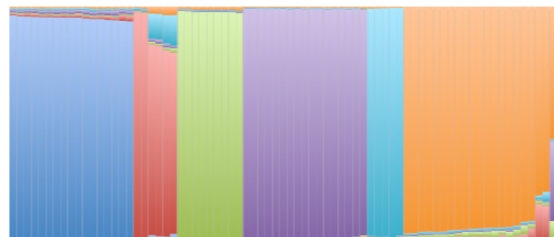

**G** *ama1*,  $K=5$

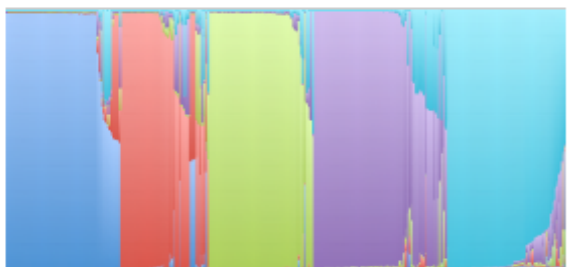

**H** *ama1*,  $K=7$

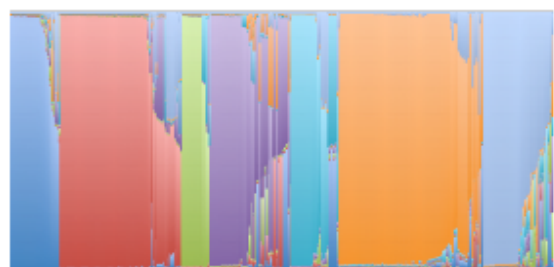

**I** *eba175*,  $K=3$

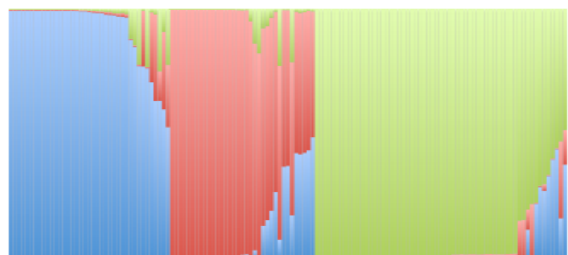

**J** *eba175*,  $K=5$

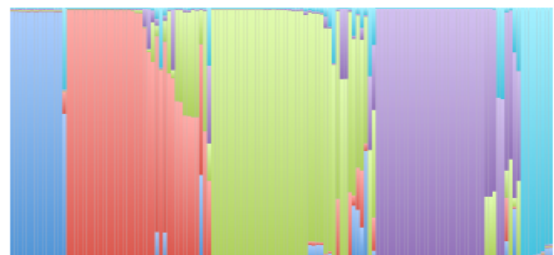

**K** *msp1*, K=3

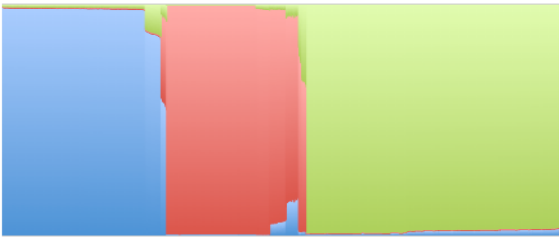

**L** *msp1*, K=5

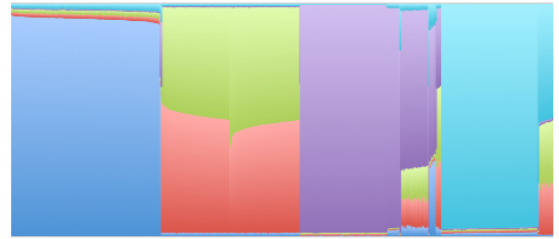

**M** *msp3*, K=3

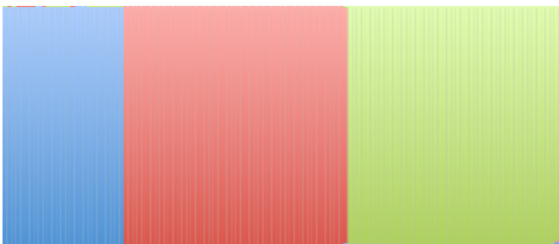

**N** *msp3*, K=5

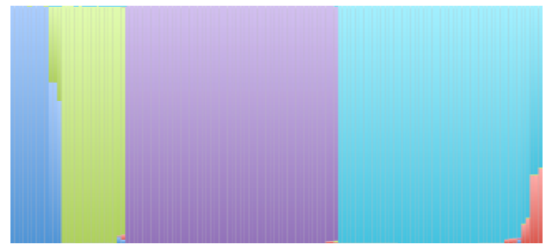

**O** *msp4*, K=3

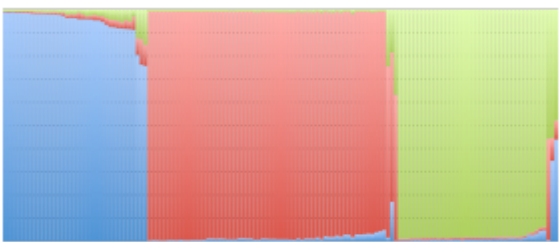

**P** *msp4*, K=5

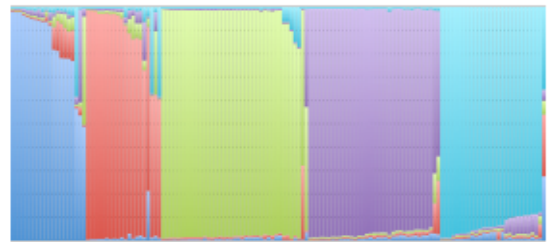

**Q** *glurp*, K=4

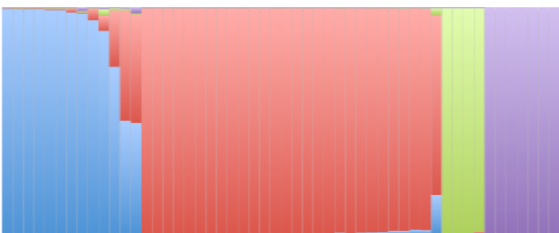

**R** *glurp*, K=6

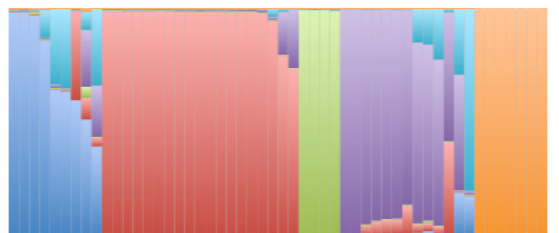

**S** *pfs48/45*, K=3

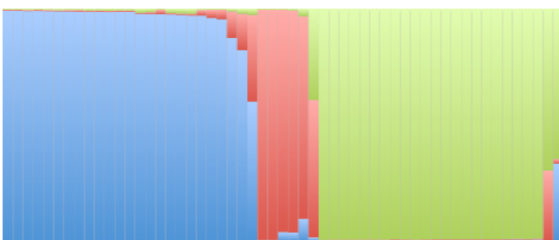

**T** *pfs48/45*, K=5

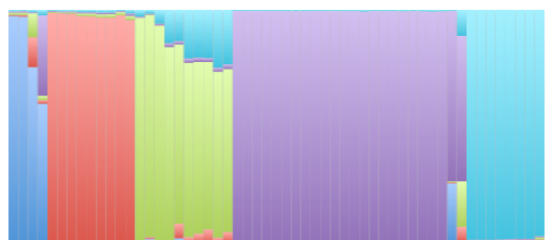

Supplement: pone.0008497.s003.pdf [file pone.0008497.s003.pdf]
