# Supplementary material for: Contrasting Population Structures of the Genes Encoding Ten Leading Vaccine-Candidate Antigens of the Human Malaria Parasite, Plasmodium falciparum
Source: PLoS One. 2009 Dec 30;4(12):e8497. doi: 10.1371/journal.pone.0008497 (PMC2795866; doi:10.1371/journal.pone.0008497)
Supplement: Table S4 — Haplotype and cluster membership for laboratory isolates. (0.03 MB XLS) [file pone.0008497.s009.xls]

## Sheet: Table S4
Table S4. Haplotype and cluster membership for laboratory isolates
GENE	ISOLATE	ORIGIN	HAPLOTYPE	CLUSTER
csp	3D7*	Amsterdam	1	2
	R033	Ghana	1	2
	7g8	Brazil	2	1
	Thai838	Thailand	12	3
	Dd2	Thailand	12	3
	T9/102	Thailand	12	3
	T4	Thailand	12	3
	FCC1/HN	China	13	3
	HB3	Honduras	28	2
	MAD20	PNG	33	2
	T9/94	Thailand	33	2
	Wellcome	Ghana	33	2
	K1	Thailand	37	2
trap	3D7	Amsterdam	1	5
	7901	Uganda	2	3,5
	C10/FCR3	The Gambia	3	3,5,6
	Dd2	Thailand	4	3
	GM14	The Gambia	42	5
	GM2	The Gambia	43	5
	GM49	The Gambia	44	5
	HB3A	Honduras	45	3
	K1	Thailand	54	3
	T9/96*	Thailand	59	4,5
lsa1	3D7*	Amsterdam	1	4
	HB3	Honduras	2	5
	T9/96	Thailand	3	4,5
ama1†	NF7	Ghana	2	6
	3D7*	Amsterdam	2	6
	FVO*	Vietnam	3	1
	V1	Vietnam	3	1
	CMP1	China	34	5
	KF1916	PNG	112	1
eba175	3D7	Amsterdam	1	2
	105	Sudan	1	2
	106/10	Sudan	2	2
	FCB	Colombia	2	2
	FCB-1	Colombia	2	2
	FCR3	Uganda	2	2
	FVO*	Vietnam	2	2
	7g8	Brazil	3	3,4
	DIV30	Brazil	3	3,4
	FCC1/HN	China	4	3
	W2	Indo-China	4	3
	HB3	Honduras	5	4
	ItDR	Brazil	5	4
	PNG1	PNG	6	1
	Malaysia	Malaysia	27	2,3,4
	T2/C6	Thailand	30	2
	Thai436	Thailand	40	2
	V1-S	Vietnam	51	3
msp1	3D7*	Unknown	1	2
	MAD20	PNG	1	2
	NF7	Ghana	1	2
	T9/94	Thailand	2	3
	RO33	Ghana	2	3
	RO71	Ivory Coast	2	3
	K1	Thailand	2	3
	Wellcome	Ghana	2	3
	FVO*	Vietnam	2	3
	FUP*	Uganda	3	1
	T807	Thailand	4	4
	Indo	Indonesia	7	2
msp3	NF54 (3D7)	Amsterdam	1	4
	RFmef3	?	1	4
	RO33	Ghana	1	4
	FCH5C2	?	2	3
	CSL2	Thailand	2	3
	7G8	Brazil	3	1
	ITG2F6	Brazil	3	1
	Indochina1	Indochina	3	1
	FCR3	The Gambia	3	1
	T9/94	Thailand	3	1
	K1	Thailand	3	1
	W2	Indochina	4	1
	HB3	Honduras	5	4
	FC27*	PNG	6	2
	TZ1	Tanzania	7	3
msp4	3D7*	Amsterdam	1	2
	NF54	Amsterdam	1	2
	T9/94	Thailand	1	2
	AA01	Brazil	1	2
	FVO	Vietnam	1	2
	ITG2	Brazil	1	2
	89FS	Paris	2	4
	MAD20	PNG	3	2
	D10	PNG	3	2
	E12	PNG	3	2
	FF7	Brazil	3	2
	IMR143	PNG	4	4
	IMR147	PNG	4	4
	MAD71	PNG	4	4
	NF7	Ghana	4	4
	IMR144	PNG	5	1
	K1	Thailand	6	3
	V1	Vietnam	6	3
	KF1916	PNG	7	1
glurp	FCC/HN1	China	2	5
	D51	Tanzania	8	1
	FUP/SP	Uganda	8	1
	FVO*	Vietnam	8	1
	B1	Brazil	5	3
	L1	Liberia	9	4
	PA17	Uganda	9	4
	3D7	Amsterdam	1	2,4
	D41	India	3	4
	F32	Tanzania	3	4
	H1	Honduras	3	4
	D28	Senegal	7	2
	MAD20	PNG	7	2
	PaloAlto	Uganda	7	2
	D7	Tanzania	10	2
	D50	Tanzania	15	2
	K1	Thailand	16	5
	D25	Tanzania	21	2
Pfs48/45	PaloAlto	Uganda	2	2
	7G8	Brazil	2	2
	RO33	Ghana	9	3
	NF54 *	Amsterdam	11	3
	T9-102	Thailand	16	1
	FCB	Colombia	16	1
	Wellcome	Ghana	16	1
	Dd2	Thailand	16	1
	K1	Thailand	16	1
	MAD20	PNG	16	1
	HB3	Honduras	19	1,2
*Isolates upon which current vaccines are based
†Haplotype and cluster designations for the remaining ama1 sequences can be found in Duan et al. 2007 (18)
